# Diverse haplotypes span human centromeres and include archaic lineages within and out of Africa

**Authors:** Sasha A. Langley<sup>1,2</sup>, Karen Miga<sup>3</sup>, Gary Karpen<sup>1,2</sup>, Charles H. Langley<sup>4</sup>

## **Affiliations:**

<sup>1</sup> Lawrence Berkeley National Laboratory, Life Sciences Division

<sup>2</sup> University of California - Berkeley, Department of Molecular and Cell Biology

<sup>3</sup> University of California - UC Santa Cruz Genomics Institute

<sup>4</sup> University of California - Davis, Department of Evolution and Ecology

\*Correspondence to [chlangley@ucdavis.edu](mailto:chlangley@ucdavis.edu).

Centromeres and their surrounding pericentric heterochromatic regions remain enigmatic and poorly understood despite critical roles in chromosome segregation<sup>1,2</sup> and disease<sup>3,4</sup>. Their repetitive structure, vast size, low recombination rates and paucity of reliable markers and genes have impeded genetic and genomic interrogations. The potentially large selective impact of recurrent meiotic drive in female meiosis<sup>5,6</sup> has been proffered as the cause of evolutionarily rapid genomic turnover of centromere-associated satellite DNAs, rapid divergence of centromeric chromatin proteins<sup>7</sup>, reduced polymorphisms in flanking regions<sup>8</sup> and high levels of aneuploidy<sup>9</sup>. Addressing these challenges, we report here the identification large-scale haplotypic variation in humans<sup>10</sup> that spans the complete centromere, centromere-proximal regions (CPR) of metacentric chromosomes, including the annotated ‘CEN’ modeled arrays comprised of Mbps of highly repeated (171 bp)  $\alpha$ -satellites<sup>11,12</sup>. The dynamics inferred by the apparent descent of *cenhaps* are complex and inconsistent with the model of recurrent fixation of newly arising, strongly favored variants. The surprisingly deep diversity includes introgressed Neanderthal centromeres in the Out-of-Africa (OoA) populations, as well as ancient lineages among Africans. The high resolution of *cenhaps* can provide great power for detecting associations with other structural and functional variants in the CPRs. We demonstrate this with two examples of strong associations of *cenhaps* with  $\alpha$ -satellite DNA content<sup>13</sup> on chromosomes X and 11. The discovery of *cenhaps* offers a new opportunity to investigate phenotypic variation in meiosis and mitosis, as well as more precise models of evolutionary dynamics in these unique and challenging genomic regions.

37 Recognizing the potential research value of well-genotyped diversity across human CPRs, we  
38 hypothesized that the low rates of meiotic exchange in these regions<sup>2</sup> might result in large,  
39 diverse haplotypes in populations, perhaps spanning both the  $\alpha$ -satellite arrays on which  
40 centromeres typically form and their flanking heterochromatic segments. Therefore, we  
41 examined the Single Nucleotide Polymorphism (SNP) linkage disequilibrium (LD) and  
42 haplotype variation surrounding the centromeres among the diverse collection of genotyped  
43 individuals in Phase 3 of the 1000 Genomes Project<sup>10</sup>. Figure 1a depicts the predicted patterns  
44 of strong LD (red) and associated unbroken haplotypic structures surrounding the centromere of  
45 a metacentric chromosome. Unweighted Pair Group Method with Arithmetic Mean (UMPGA)  
46 clustering on 800 SNPs immediately flanking the chrX centromeric gap in males (Fig. 1c)  
47 reveals a clear haplotypic structure that, in many cases, extends to a much larger region ( $\approx$ 8  
48 Mbp), Fig. 1b). Similar clustering of the imputed genotypes of females also falls into the same  
49 distinct high-level haplotypes (Extended Data Fig. 1). This discovery of the predicted haplotypes  
50 spanning CPRs, or *cenhaps*, opens a new window into their evolutionary history and functional  
51 potential.

52 The pattern of geographic differentiation across the inferred cenhaps exhibits higher  
53 diversity in African samples, as observed throughout the genome<sup>10</sup>. Despite being fairly  
54 common among Africans today, a distinctly diverged cenhap at the top of Fig. 1b,c is rare in  
55 OoA populations. Examination of the haplotypic clustering and estimated synonymous and  
56 nonsynonymous divergence in the coding regions of 21 genes included in the chrX cenhap  
57 region (see Extended Data Table 1) yields a parallel relationship among the three major cenhaps  
58 and an estimated Time of the Most Recent Common Ancestor (TMRCA) of  $\approx$ 700 KYA (Fig. 1d)  
59 for this most diverged example. While ancient, putatively introgressed archaic segments have  
60 been inferred in African genomes<sup>14,15</sup>, this cenhap stands out as genomically (if not genetically)  
61 large. The persistence of such ancient cenhaps is inconsistent with the simplest explanations of  
62 the rapid turnover of genetic variation in CPRs and may be connected to the atypically high  
63 conservation of  $\alpha$ -satellite on chrX<sup>16,17,18</sup>. Further, the detection of near-ancient segments  
64 spanning the centromere contrasts with the observation of substantially more recent ancestry  
65 across the remainder of chrX and with the expectation of reduced archaic sequences on chrX<sup>19</sup>.  
66 A large block on the right in Fig. 1b, where recombination has substantially degraded the  
67 haplotypic structure, is comprised of SNPs in exceptionally high frequency in Africans. Its  
68 history in “anatomically modern humans” (AMH) may be shared with the apparently archaic  
69 cenhap in Africa. Many putative, distal recombinants are observed OoA that likely contribute to  
70 associations of SNPs in this region with diverse set of phenotypes, including male pattern hair  
71 loss<sup>20</sup> and prostate cancer<sup>21</sup>.

72 This unexpected deep history of the chrX CPR region raises the possibility of even more  
73 ancient cenhap lineages, either derived by admixture with archaic hominins or maintained by  
74 balancing forces. A survey of the other chromosomes uncovered several interesting examples  
75 (see Extended Data Fig. 2), two of which we examined in detail. To identify Neanderthal and  
76 Denisovan admixture we looked for highly diverged alleles OoA that shared a strong excess of  
77 derived alleles with archaic hominids and not with AMH genomes<sup>22</sup>. Applying this approach to  
78 CPR of chr11 we find it represents a compelling example of Neanderthal admixture<sup>23</sup>. Fig. 2a  
79 illustrates this in the context of the seven most common chr11 cenhaps. The most diverged  
80 lineage contains a small basal group of OoA genomes (highlighted in green). Members of this  
81 cenhap carry a large proportion of the derived alleles assigned to the Neanderthal lineage,  
82  $DM/(DM+DN) = 0.98$ , where DM is the cenhap mean number of shared Neanderthal Derived  
83 Matches, and DN is the cenhap mean number of Neanderthal Derived Non-matches (Fig2a, at  
84 left). AN is the number of Neanderthal-cenhap Non-matches that are Ancestral in the  
85 Neanderthal and derived in the cenhap. The ratio  $DM/(DM+AN) = 0.91$  is a measure of the  
86 proportion of the cenhap lineage shared with Neanderthals, supporting the conclusion that this  
87 chr11 cenhap is an introgressed archaic centromere. Fig. 2b shows these mean counts for each  
88 SNP class by cenhap group, confirming that the affinity to Neanderthals is slightly stronger than  
89 to Denisovans. A second basal African lineage separates shortly after the Neanderthal  
90 (highlighted in purple). It is unclear if this cenhap represents an introgression from a distinct  
91 archaic hominin in Africa or a surviving ancient lineage within the population that gave rise to  
92 AMHs. The relatively large expanses of these cenhaps and unexpectedly sparse evidence of  
93 recombination could be explained either by relatively recent introgressions or by cenhap-specific  
94 suppression of crossing over (e.g., an inversion) with other AMH genomes in this CPR. As with  
95 chrX above, the clustering of cenhaps based on coding SNPs (Fig. 2d) yields a congruent  
96 topology and estimates of TMRCAs of the two basal cenhaps of 1.1 and 0.8 MYA, consistent  
97 with relatively ancient origins. Among the 37 genes ‘captured’ in this apparent Neanderthal  
98 introgressed chr11 cenhap are 34 odorant receptors (ORs) reported to be associated with  
99 variation in human chemical perception<sup>24</sup>. 52 amino acid replacements among 20 of these ORs  
100 are associated with the Neanderthal cenhap (Extended Data Table 2). Similarly eight of these  
101 ORs harbor 12 distinct amino acid replacements associated with the second basal cenhap found  
102 primarily within Africa. These two ancient lineages share only two nonsynonymous  
103 substitutions. Given relatively large number of substitutions<sup>24</sup>, this introgressed chr11 archaic  
104 cenhap likely determines Neanderthal-specific determinants of smell and taste with significant  
105 impacts on variation in perception.

106 The most diverged cenhap on chr12 is a basal clade (Fig. 2c, indicated in brown) common in  
107 Africa, but, like the most diverged chrX cenhap, it is not represented among the descendants of

108 the OoA migrations<sup>25</sup>. The great depth of the lineage of this cenhap is further supported by  
109 analysis of archaic variation. Consistent with the hypothesis that this branch split off before that  
110 of Neanderthals/Denisovans, members of this cenhap share fewer matches with derived SNPs on  
111 the Neanderthals and Denisovans lineages (DM) and exhibit strikingly more ancestral non-  
112 matches (AN) than other chr12 cenhaps (see Fig. 2b). This putatively archaic chr12 cenhap  
113 represents a large and obvious example of the genome-wide introgressions into African  
114 populations inferred from model-dependent analyses of the distributions of sequence  
115 divergence.<sup>14,15</sup> The small OoA cenhap nested within a mostly African subclade (indicated in  
116 blue in Fig. 2c) appears to be a typical Eurasian archaic introgression with high affinity to  
117 Neanderthals ( $DM/(DN+DM) = 0.91$  and  $DM/(DM+AN) = 0.90$ ) than to Denisovans (Fig. 2b).  
118 This bolsters the conclusion that the basal cenhap represents a distinct and more ancient lineage.  
119 Unfortunately, there are too few coding bases in this region to support confident estimation of  
120 the TMRCA of these chr12 archaic cenhaps, but the basal cenhap is twice as diverged as the  
121 apparent introgressed Neanderthal cenhap, placing the TMRCA at  $\sim 1.1$  MYA, assuming the  
122 Neanderthal TMRCA was 575KYA<sup>26</sup>. While there is no direct evidence of recent introgression,  
123 the large genomic scale of this most diverged cenhap (relative to apparent exchanges in other  
124 cenhaps) is consistent with recent admixture with an extinct archaic in Africa, although, again,  
125 suppression of crossing over is an alternative explanation.

126 The CPRs of chromosomes X, 11 and 12 harbor a diversity of large cenhaps including those  
127 representing archaic lineages. Notably, the CPRs of many chromosomes harbor diverged/basal  
128 lineages that are likely to be relatively old, if not archaic (Extended Data Fig. 2). For example,  
129 chromosome 8 contains a putative archaic cenhap limited to Africa with an estimated TMRCA of  
130 817 KYA (Extended Data Fig. 3) and a basal chr10 cenhap appears to be another clear  
131 Neanderthal introgression (Extended Data Fig. 4).

132 These SNP-based cenhaps portray a rich view of the diversity in the unique segments flanking  
133 repetitive regions. While the divergence of satellites may be dynamic on a shorter time scale<sup>27</sup>,  
134 we reasoned that the paucity of evidence of exchange in or near regions known to contain  
135 satellite DNA arrays would create cenhap associations with satellite divergence in both sequence  
136 and array size. Miga, *et al.* 2014<sup>13</sup> generated chromosome-specific graphical models of the  $\alpha$ -  
137 satellite arrays, which revealed a bimodal distribution in estimated chrX-specific  $\alpha$ -satellite array  
138 (DXZ1) sizes<sup>28</sup> for a subset of the 1000 Genomes males (Fig. 1b extends this to the entire data).  
139 Fig. 3a shows the substantial differences in the cumulative distributions of the three common  
140 chrX cenhaps designated in Fig. 1c. The distributions of  $\alpha$ -satellite array size in cenhap-  
141 homozygous females are parallel to males, and imputed cenhap heterozygotes are intermediate,  
142 as expected. Similarly, Fig. 3b shows an even more striking example of variation in array size  
143 between cenhap homozygotes on chr11, and Fig. 3c demonstrates that heterozygotes of the two

144 most common cenhaps are reliably intermediate in size. While we confirmed that reference bias  
145 does not explain the observed cenhaps with large array size on chrX and chr11 (see Methods,  
146 Fig. 1b, Fig. 3b and Extended Data Fig. 4), it is a potential explanation for particular instances of  
147 cenhaps with small array sizes, e.g., the relatively low chrX-specific  $\alpha$ -satellite content in the  
148 highly diverged African cenhap (see Fig1b,c and Fig. 3a in purple). Importantly, our results  
149 demonstrate that cenhaps robustly tag a component of the genetic variation in array size.

150 The potential impact of sequence variation in CPRs and their associated satellites on the  
151 function of centromeres has been long recognized<sup>5,6</sup> but difficult to study. The natural  
152 opportunity for meiotic drive in asymmetric female meioses has been cited as the likely  
153 explanation for the rapid turnover of satellite sequences and excess nonsynonymous divergence  
154 of several centromere proteins, some of which interact directly with the DNA<sup>7</sup>. The observed  
155 deep lineages and high levels of haplotypic diversity across the CPRs (Extended Data Fig. 2)  
156 conflict with the predictions of a naïve turnover model based on recurrent strong directional  
157 selection yielding sequential fixation of driven centromeric haplotypes. Models that maintain  
158 variation, including the inherent frequency-dependence of meiotic drive, the likely tradeoff with  
159 transmission fidelity<sup>9</sup>, and the expected impact of unlinked suppressors<sup>29</sup>, are plausible  
160 alternatives.

161 Our identification and characterization of human cenhaps raise new questions about the  
162 evolution of these unique genomic regions, but also provide a depth of diversity to quantitatively  
163 address them in the future. These results transform large, previously obscure and avoided  
164 genomic regions into genetically rich and tractable resources. Most importantly, cenhaps can  
165 now be investigated for associations with variation in evolutionarily important chromosome  
166 functions, such as meiotic drive<sup>30</sup> and recombination<sup>2</sup>, as well as diseases arising from  
167 aneuploidy in the germline<sup>3</sup> and in somatic cells during development<sup>31,32,33</sup> and aging<sup>4</sup>.

168  
169

170 Literature Cited

- 171
- 172 1. Allshire, R. C. & Karpen, G. H. Epigenetic regulation of centromeric chromatin: old dogs,  
173 new tricks? *Nat Rev Genet* **9**, 923–937 (2008).
- 174 2. Nambiar, M. & Smith, G. R. Repression of harmful meiotic recombination in centromeric  
175 regions. *Seminars in Cell & Developmental Biology* **54**, 188–197 (2016).
- 176 3. Nagaoka, S. I., Hassold, T. J. & Hunt, P. A. Human aneuploidy: mechanisms and new insights  
177 into an age-old problem. *Nature Reviews Genetics* **13**, 493–504 (2012).
- 178 4. Naylor, R. M. & van Deursen, J. M. Aneuploidy in Cancer and Aging. *Annu. Rev. Genet.* **50**,  
179 45–66 (2016).
- 180 5. Novitski, E. Genetic measures of centromere activity in *Drosophila melanogaster*. *Journal of*  
181 *Cellular and Comparative Physiology* **45**, 151–169 (1955).
- 182 6. Chmátal, L. *et al.* Centromere Strength Provides the Cell Biological Basis for Meiotic Drive  
183 and Karyotype Evolution in Mice. *Current Biology* **24**, 2295–2300 (2014).
- 184 7. Henikoff, S. & Malik, H. S. Centromeres: Selfish drivers. *Nature* (2002).  
185 doi:10.1038/417227a
- 186 8. Aguade, M., Miyashita, N. & Langley, C. H. Reduced Variation in the Yellow-Achaete-Scute  
187 Region in Natural Populations of *Drosophila Melanogaster*. *Genetics* **122**, 607–615 (1989).
- 188 9. Zwick, M. E., Salstrom, J. L. & Langley, C. H. Genetic Variation in Rates of Nondisjunction:  
189 Association of Two Naturally Occurring Polymorphisms in the Chromokinesin nod With  
190 Increased Rates of Nondisjunction in *Drosophila melanogaster*. *Genetics* **152**, 1605–1614  
191 (1999).
- 192 10. The 1000 Genomes Project Consortium. A global reference for human genetic variation.  
193 *Nature* **526**, 68–74 (2015).



- 194 11. Rosenberg, H., Singer, M. & Rosenberg, M. Highly reiterated sequences of  
195 SIMIANSIMIANSIMIANSIMIANSIMIAN. *Science* **200**, 394–402 (1978).
- 196 12. Willard, H. F. Chromosome-specific organization of human alpha satellite DNA. *Am J Hum*  
197 *Genet* **37**, 524–532 (1985).
- 198 13. Miga, K. H. *et al.* Centromere reference models for human chromosomes X and Y satellite  
199 arrays. *Genome Res.* **24**, 697–707 (2014).
- 200 14. Hammer, M. F., Woerner, A. E., Mendez, F. L., Watkins, J. C. & Wall, J. D. Genetic  
201 evidence for archaic admixture in Africa. *PNAS* **108**, 15123–15128 (2011).
- 202 15. Browning, S. R., Browning, B. L., Zhou, Y., Tucci, S. & Akey, J. M. Analysis of Human  
203 Sequence Data Reveals Two Pulses of Archaic Denisovan Admixture. *Cell* **173**, 53–61.e9  
204 (2018).
- 205 16. Durfy, S. J. & Willard, H. F. Concerted evolution of primate alpha satellite DNA. *Journal of*  
206 *Molecular Biology* **216**, 555–566 (1990).
- 207 17. Warburton, P. E., Haaf, T., Gosden, J., Lawson, D. & Willard, H. F. Characterization of a  
208 Chromosome-Specific Chimpanzee Alpha Satellite Subset: Evolutionary Relationship to  
209 Subsets on Human Chromosomes. *Genomics* **33**, 220–228 (1996).
- 210 18. Schueler, M. G. *et al.* Progressive proximal expansion of the primate X chromosome  
211 centromere. *Proceedings of the National Academy of Sciences* **102**, 10563–10568 (2005).
- 212 19. Dutheil, J. Y., Munch, K., Nam, K., Mailund, T. & Schierup, M. H. Strong Selective Sweeps  
213 on the X Chromosome in the Human-Chimpanzee Ancestor Explain Its Low Divergence.  
214 *PLOS Genetics* **11**, e1005451 (2015).
- 215 20. Hagenaars, S. P. *et al.* Genetic prediction of male pattern baldness. *PLoS Genetics* **13**,  
216 (2017).

- 217 21. Al Olama, A. A. *et al.* A meta-analysis of 87,040 individuals identifies 23 new susceptibility  
218 loci for prostate cancer. *Nat. Genet.* **46**, 1103–1109 (2014).
- 219 22. Green, R. E. *et al.* A Draft Sequence of the Neandertal Genome. *Science* **328**, 710–722  
220 (2010).
- 221 23. Prüfer, K. *et al.* The complete genome sequence of a Neanderthal from the Altai Mountains.  
222 *Nature* **505**, 43–49 (2014).
- 223 24. Trimmer, C. *et al.* Genetic variation across the human olfactory receptor repertoire alters  
224 odor perception. (2017). doi:10.1101/212431
- 225 25. Bae, C. J., Douka, K. & Petraglia, M. D. On the origin of modern humans: Asian  
226 perspectives. *Science* **358**, eaai9067 (2017).
- 227 26. Prüfer, K. *et al.* A high-coverage Neandertal genome from Vindija Cave in Croatia. *Science*  
228 eaao1887 (2017). doi:10.1126/science.aao1887
- 229 27. Smith, G. P. Evolution of repeated DNA sequences by unequal crossover. **191**, 528–535
- 230 28. Willard, H. F., Smith, K. D. & Sutherland, J. Isolation and characterization of a major  
231 tandem repeat family from the human X chromosome. *Nucleic Acids Res* **11**, 2017–2034  
232 (1983).
- 233 29. Charlesworth, B. & Hartl, D. L. Population Dynamics of the Segregation Distorter  
234 Polymorphism of *Drosophila Melanogaster*. *Genetics* **89**, 171–192 (1978).
- 235 30. Meyer, W. K. *et al.* Evaluating the Evidence for Transmission Distortion in Human  
236 Pedigrees. *Genetics* **191**, 215–232 (2012).
- 237 31. Angell, R. R., Templeton, A. A. & Aitken, R. J. Chromosome studies in human in vitro  
238 fertilization. *Hum Genet* **72**, 333–339 (1986).



- 239 32. Coonen, E. *et al.* Anaphase lagging mainly explains chromosomal mosaicism in human  
240 preimplantation embryos. *Hum Reprod* **19**, 316–324 (2004).
- 241 33. Vázquez-Diez, C. & FitzHarris, G. Causes and consequences of chromosome segregation  
242 error in preimplantation embryos. *Reproduction* **155**, R63–R76 (2018).
- 243
- 244 Acknowledgements: Benjamin Vernot, Graham Coop, Yuh Chwen Grace Lee.

1

2 **Figure 1. Strong LD across centromeric gaps forms large-scale centromere-spanning**

3 **haplotypes, or *cenhaps*.** **a.** The predicted patterns of the magnitude LD (triangle at top) and  
4 genotypes in CPR clustered into haplotypes surrounding the centromeric region of a metacentric  
5 chromosome in a large outbreeding population (central blue bands), if crossing over declines to  
6 zero in and around the highly repeated DNA where the centromere is typically found in the  
7 chromosome (blue and green at bottom of **a**). **b.** Above, the linkage disequilibria between pairs  
8 of 17702 SNPs (Left: chrX:55623011-58563685, Right: chrX: 61725513-68381787; hg19)  
9 flanking the centromere and  $\alpha$ -satellite assembly gap (red vertical line) from 1231 human male X  
10 chromosomes from the 1000 Genomes Project. The color maps (see the adjacent legend) to the -  
11  $\log_{10}(p) \times 10^{-3}$ , where the  $p$  value derives from the  $2 \times 2 \chi^2$  for each pair of SNPs. Below, broad  
12 haplotypic representation of these same data. SNPs were filtered for minor allele count  
13 ( $\text{MAC} \geq 60$ ). Minor alleles shown in black. Poorly genotyped SNPs near edges of the gap (red  
14 line) were masked. Superpopulation (**SP**; **AFR**ica, **AMeR**icas, **East AS**ia, **EU**rope, **South AS**ia)  
15 and scaled estimate of chrX-specific  $\alpha$ -satellite array size (**AS**) indicated at left side.  
16 Approximate position of HuRef chrX indicated by black asterisk at right of the tree. Dendrogram  
17 represents UPGMA clustering based on the hamming distance between haplotypes comprised of  
18 800 filtered SNPs immediately flanking the centromere (Left: chrX:58374895-58563685, Right:  
19 chrX:61725513-61921419; hg19), shown in detail in **c**. The three most common X cenhaps  
20 highlighted with colored vertical bars. **d.** A UPGMA tree based on the synonymous divergence  
21 in 17 genes (see Table S1) in the 3 major chrX cenhaps (indicated in **c**), assuming the TMRCA  
22 of humans and chimps is 6.5MY. Widths of the triangles are proportional to the  $\log_{10}$  of number  
23 of members of each cenhap, and the height is proportional to the average divergence within each  
24 cenhap.

25

26

27

28

29 **Figure 2. Archaic cenhaps are found in AMH populations. a.** Haplotypic representation of  
30 9151 SNPs from 5008 imputed chr11 genotypes from the 1000 Genomes Project (Left:  
31 chr11:50509493-51594084, Right: chr11:54697078-55326684; hg19). SNPs were filtered for  
32  $MAC \geq 35$  and passing the *4gt\_dco* with a tolerance of three (see Methods). Minor alleles shown  
33 in black, assembly gap indicated by red line. Haplotypes were clustered with UPGMA based on  
34 the hamming distance between haplotypes comprised of 1000 SNPs surrounding the gap (Left:  
35 chr11: 51532172-51594084, Right: chr11:54697078-54845667; hg19). Superpopulation and  
36 cenhap partitioning indicated in bars at far left. Log<sub>2</sub> counts of DM (derived in archaic, shared by  
37 haplotype), DN (derived in archaic, not shared by haplotype) and AN (ancestral in archaic, not  
38 shared by haplotype) for each cenhap relative to Altai Neanderthal (NEA) and Denisovan (DEN)  
39 at left. Grey horizontal bar (bottom) indicates region included in analysis of archaic content;  
40 black bars indicate SNPs with data for archaic and ancestral states. **b.** Bar plots indicating the  
41 mean and 95% confidence intervals of DM, DN, AM (ancestral in archaic, shared by cenhap)  
42 and AN counts for cenhap groups (as partitioned in a. and c.) relative to Altai Neanderthal and  
43 Denisovan genomes, using chimpanzee as an outgroup<sup>1</sup>. **c.** Haplotypic representation of 21950  
44 SNPs from 5008 imputed chr12 genotypes from the 1000 Genomes Project (Left:  
45 chr12:33939700-34856380, Right: chr12:37856765-39471374; hg19). SNPs were filtered for  
46  $MAC \geq 35$ . Minor alleles shown in black. Centromeric gap indicated by red line. Haplotypes were  
47 clustered with UPGMA based on 1000 SNPs surrounding the gap (Left: chr12: 34821738-  
48 34856670, Right: chr12:37856765-37923684; hg19). Bars at side and bottom same as in **a.** **d.** A  
49 UPGMA tree based on the synonymous divergence in 30 genes in the 7 major chr11 cenhaps  
50 (see Table S2), assuming the TMRCA of humans and chimpanzee is 6.5MY (see Methods and  
51 legend for Fig 1d).

52

53

54

55

56 **Figure 3. Cenhaps differ in  $\alpha$ -satellite array size.** **a.** Empirical cumulative density (ecdf) of  
57 chrX  $\alpha$ -satellite array size for cenhap, homozygotes and heterozygotes. 1\_2 and 1\_3  
58 heterozygotes were excluded due to insufficient data. Female (F) values were normalized ( $\times 0.5$ )  
59 to facilitate plotting with hemizygote male (M) data. **b.** Haplotypic representation of 1000 SNPs  
60 from 1640 imputed chr11 genotypes from 820 cenhap-homozygous individuals. SNPs were  
61 filtered for  $MAC \geq 35$  and passing the *4gt\_dco*. Minor alleles shown in black. Assembly gap  
62 indicated by red line. Superpopulation (SP) and scaled chr11-specific  $\alpha$ -satellite array size (AS)  
63 at left. Cenhap partitions at right; most common cenhap (“1”) and cenhap with larger mean array  
64 size (“2”) are highlighted. Most probable HuRef cenhap genotypes are indicated by black  
65 asterisks at right. **c.** Empirical cumulative density of array size for chr11 cenhap (from **b**)  
66 homozygotes (1\_1 and 2\_2) and heterozygotes (1\_2).

67

68

Figure 1

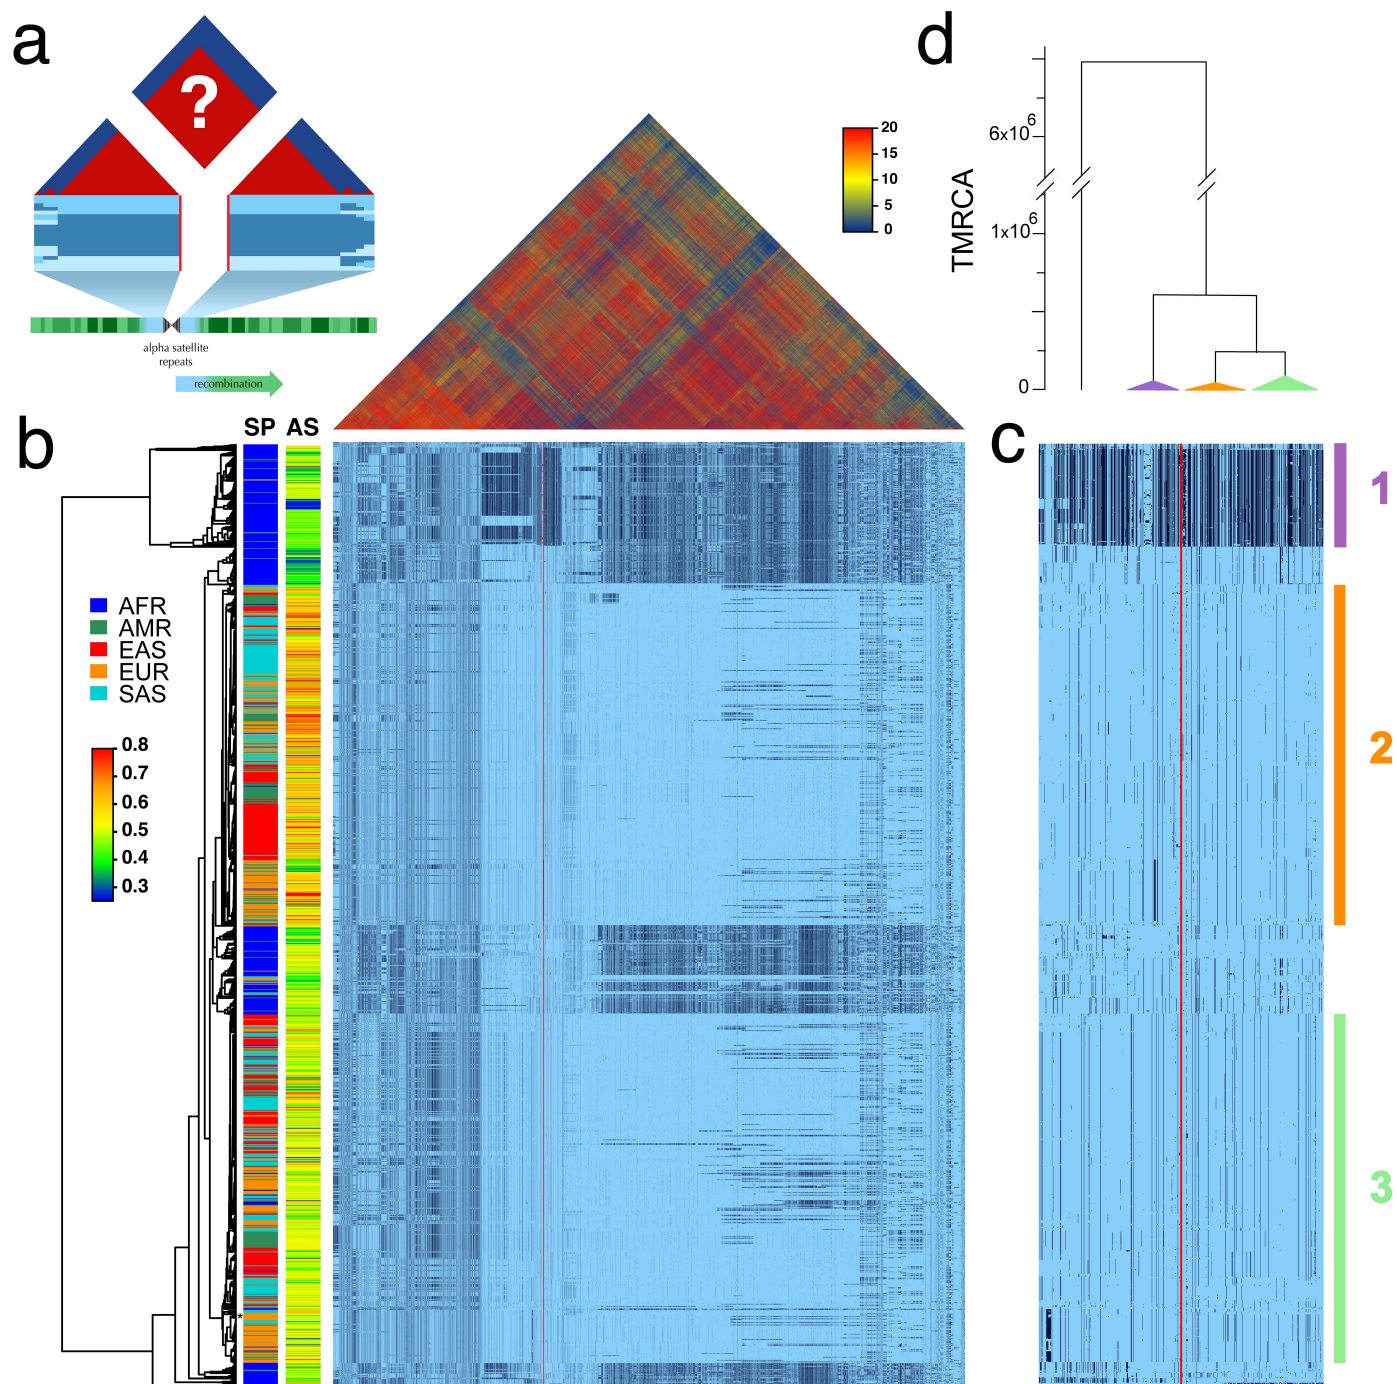

Figure 2

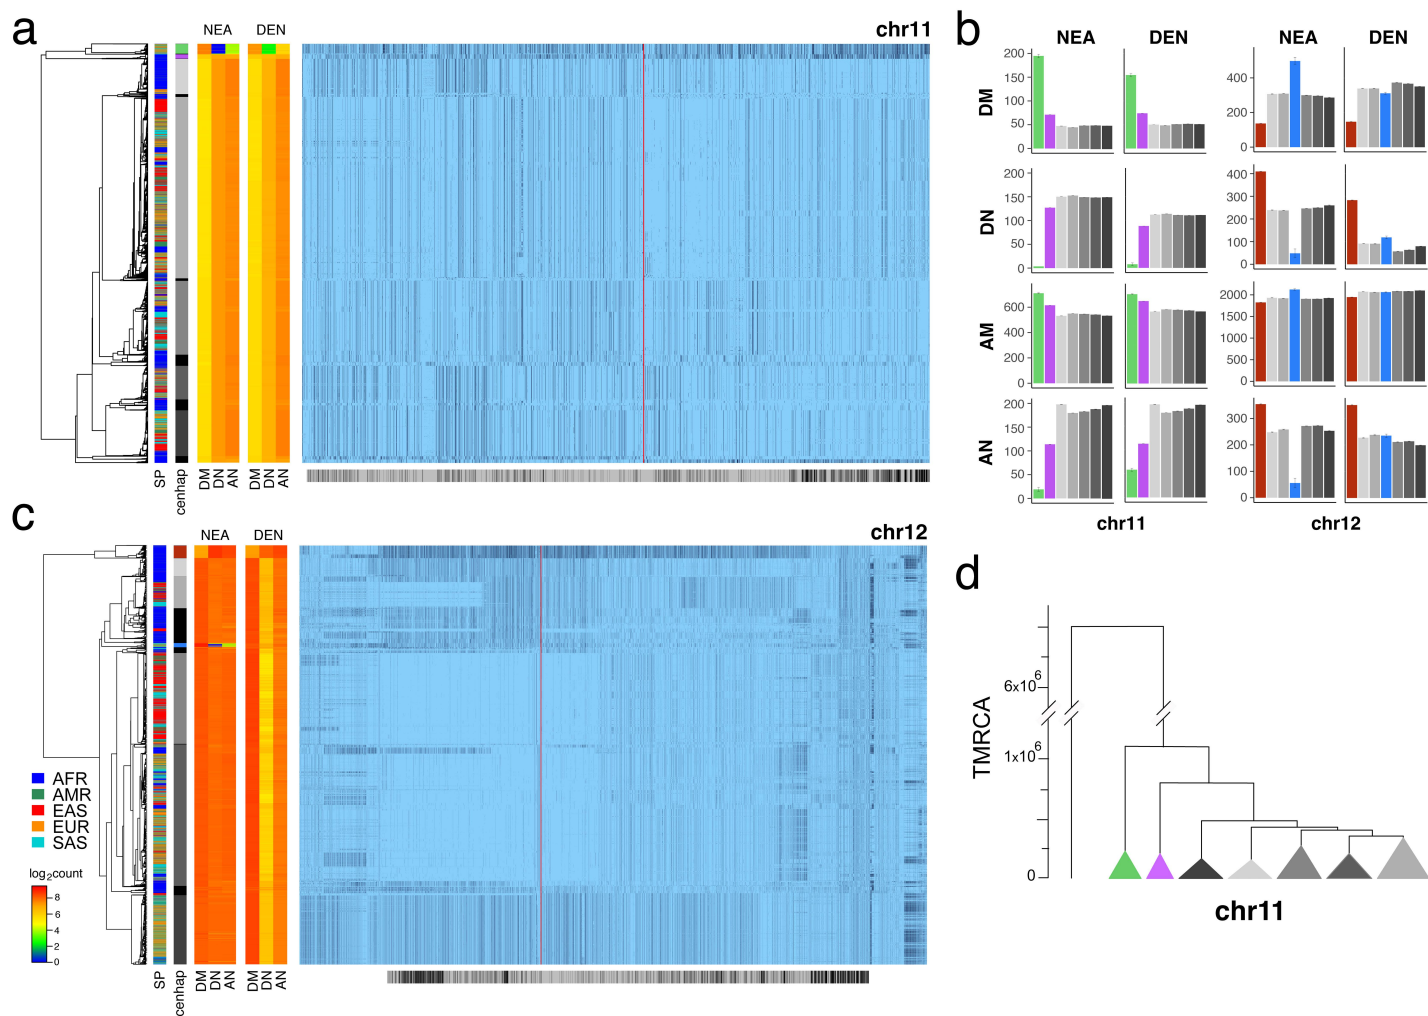



Figure 3

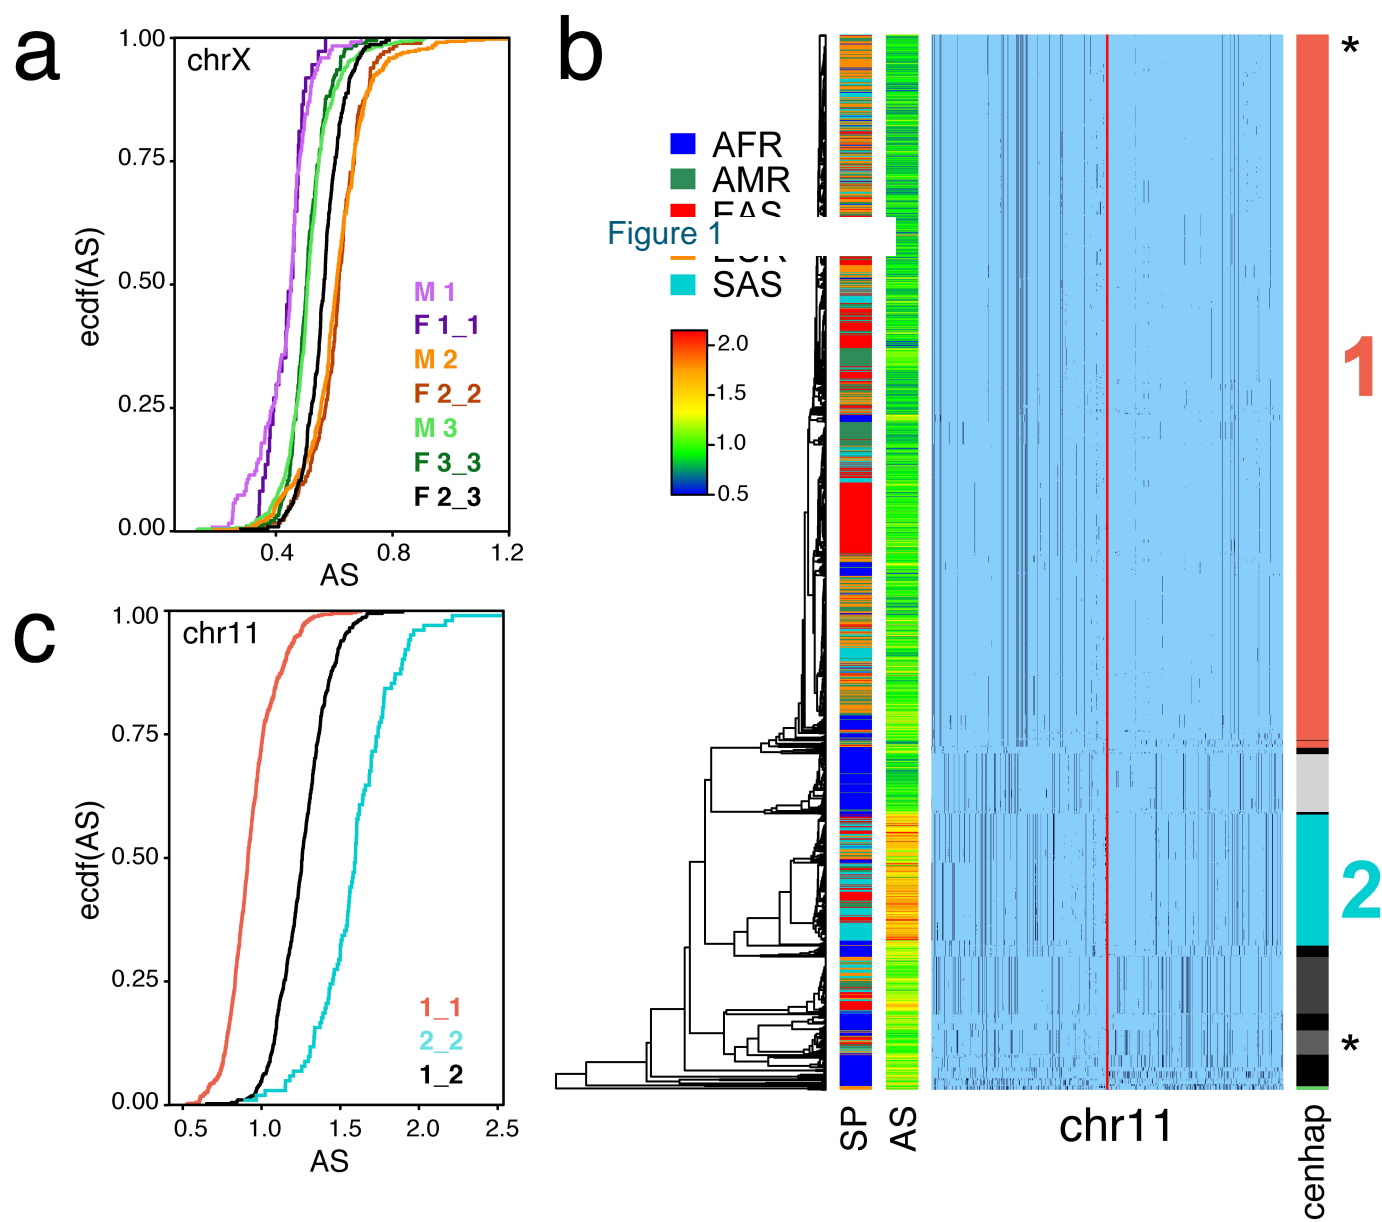

Source: https://www.biorxiv.org/content/10.1101/351569v1.full.pdf
